# Supplementary material for: Numerical investigation of the Arctic ice–ocean boundary layer and implications for air–sea gas fluxes
Source: Copernicus journal article supplement (doi:10.5194/os-13-61-2017), 2017-01-23
Supplement: Supplementary file 1 [file os-13-61-2017-supplement.zip]

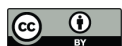

*Supplement of*

## **Numerical investigation of the Arctic ice–ocean boundary layer and implications for air–sea gas fluxes**

**Arash Bigdeli et al.**

*Correspondence to:* Arash Bigdeli (arash\_bigdeli@uri.edu)

- os-13-61-2017-supplement-title-page.pdf
- Post proc.zip

The copyright of individual parts of the supplement might differ from the CC-BY 3.0 licence.
